# Supplementary material for: Dissecting Phenotype from Genotype with Clinical Isolates of SARS-CoV-2 First Wave Variants
Source: MDPI journal article supplement (doi:10.3390/v15030611), 2023-02-23
Supplement: s1 [file s1]

**TABLE S4. Model Fit Parameters**

|        |                                          | WA1/2020             | UT21                 | UT29                 | UT5                    | UT23                 |
|--------|------------------------------------------|----------------------|----------------------|----------------------|------------------------|----------------------|
| Female | Virus production (p)                     | 2.94<br>[0.74,19.62] | 2.45<br>[1.68,21.02] | 8.20<br>[2.93,41.41] | 2.14<br>[1.21,13.73]   | 1.22<br>[1.05,15.57] |
|        | Virus clearance (c)                      | 8.73<br>[2.33,50.0]  | 6.87<br>[3.74,49.67] | 8.41<br>[3.02,47.58] | 18.10<br>[11.45,49.70] | 4.29<br>[3.38,48.21] |
|        | Infectivity ( $\beta$ )<br>$\times 10^5$ | 1.22<br>[0.42, 4.66] | 1.60<br>[0.1,2.32]   | 0.44<br>[0.12,2.96]  | 4.70<br>[1.08,420]     | 6.45<br>[0.77,481]   |
|        | Infected cell clearance ( $\delta$ )     | 1.70<br>[1.39,1.92]  | 1.69<br>[1.37,2.06]  | 4.51<br>[2.62,5.35]  | 1.46<br>[1.17,1.73]    | 1.16<br>[0.93,1.38]  |
| Male   | Virus production (p)                     | 0.42<br>[0.10,12.93] | 0.55<br>[0.10,7.11]  | 0.95<br>[0.38,15.41] | 1.05<br>[0.77,4.35]    | 0.10<br>[0.01,2.13]  |
|        | Virus clearance (c)                      | 10.0<br>[8.30,50.0]  | 10.0<br>[8.30,48.77] | 5.33<br>[4.48,45.75] | 10.0<br>[8.43,49.50]   | 3.09<br>[0.06,49.77] |
|        | Infectivity ( $\beta$ )<br>$\times 10^5$ | 5.0<br>[0.1,7.72]    | 4.65<br>[0.915,6.0]  | 4.06<br>[0.66,8.13]  | 5.0<br>[2.38,244]      | 5.0<br>[0.64,90.4]   |
|        | Infected cell clearance ( $\delta$ )     | 1.22<br>[0.98,1.47]  | 0.97<br>[0.48,1.16]  | 1.34<br>[1.07,1.61]  | 0.96<br>[0.77,1.14]    | 3.07<br>[2.46,3.66]  |

Parameter values obtained from fitting Equations 1-4 to viral loads from female and male mice infected with WA1/2020, UT21, UT29, UT5 or UT23. The infected cell clearance for female mice was fixed and allowed to vary within  $\pm 20\%$ .
