# Supplementary material for: Dissecting Phenotype from Genotype with Clinical Isolates of SARS-CoV-2 First Wave Variants
Source: MDPI journal article supplement (doi:10.3390/v15030611), 2023-02-23
Supplement: s1 [file s1]

**TABLE S7. Mouse gene expression**

|                | WA1/2020 |      |      | UT21 |      |      | UT29 |      |      | UT5 |      |      | UT23 |      |      |
|----------------|----------|------|------|------|------|------|------|------|------|-----|------|------|------|------|------|
|                | D1       | D3   | D5   | D1   | D3   | D5   | D1   | D3   | D5   | D1  | D3   | D5   | D1   | D3   | D5   |
| <i>ACE2</i>    | 2.2      | 2.1  | 0.7  | 1.9  | 1.5  | 0.9  | 2.3  | 1.8  | 0.3  | 2.5 | 2.2  | 0.8  | 1.7  | 2.0  | 1.1  |
| <i>AGTR2</i>   | 2.9      | 2.9  | 1.3  | 2.3  | 2.3  | 1.8  | 3.1  | 2.5  | 1.7  | 3.3 | 2.4  | 1.3  | 2.3  | 3.0  | 1.3  |
| <i>CCL2</i>    | 4.7      | 8.1  | 4.7  | 3.6  | 7.7  | 2.6  | 4.2  | 8.1  | 4.7  | 5.7 | 8.9  | 5.3  | 2.8  | 8.6  | 3.8  |
| <i>CCL3</i>    | 0.9      | 2.8  | 2.5  | 0.3  | 2.4  | 1.1  | 0.8  | 2.3  | 2.3  | 1.5 | 2.9  | 2.8  | 0.4  | 3.2  | 2.0  |
| <i>CXCL10</i>  | 6.4      | 9.7  | 5.3  | 5.7  | 9.3  | 3.9  | 6.3  | 9.4  | 5.5  | 7.9 | 10.0 | 5.6  | 5.1  | 10.4 | 4.9  |
| <i>DPP4</i>    | 0.2      | 0.1  | -0.8 | -0.4 | 0.0  | -0.7 | -0.1 | -0.5 | -1.2 | 0.6 | 0.4  | -1.0 | 0.3  | 0.4  | -0.6 |
| <i>IFNG</i>    | 3.4      | 3.9  | 3.8  | 3.0  | 3.4  | 2.5  | 3.4  | 3.7  | 3.2  | 3.6 | 3.9  | 4.4  | 2.6  | 4.1  | 3.9  |
| <i>IL10</i>    | 2.4      | -0.4 | -0.6 | 2.0  | -1.5 | -0.8 | 2.6  | -1.3 | -0.7 | 2.9 | -0.6 | -0.2 | 3.3  | -0.3 | 0.2  |
| <i>IL6</i>     | 3.8      | 5.5  | 3.0  | 3.0  | 5.2  | 2.1  | 3.7  | 5.6  | 3.3  | 5.0 | 5.6  | 3.3  | 2.8  | 5.7  | 2.2  |
| <i>TMPRSS2</i> | 0.0      | -0.5 | -0.3 | -0.4 | -0.8 | 0.2  | -0.2 | -0.9 | -0.6 | 0.5 | 0.3  | -0.6 | 0.3  | -0.5 | 0.2  |
| <i>TNF</i>     | 1.8      | 2.7  | 1.6  | 1.2  | 2.2  | 0.6  | 1.3  | 2.1  | 1.7  | 2.0 | 2.7  | 2.1  | 1.4  | 3.1  | 1.3  |
