# Supplementary material for: Dissecting Phenotype from Genotype with Clinical Isolates of SARS-CoV-2 First Wave Variants
Source: MDPI journal article supplement (doi:10.3390/v15030611), 2023-02-23
Supplement: s1 [file s1]

**TABLE S6. Neutrophil counts at 5 dpi within sections of right lung lobes of infected mice**

| Treatment | Mouse ID # | Sex | Lung lobe 1 (cells/ m <sup>2</sup> ) | Lung lobe 2 (cells/ m <sup>2</sup> ) | Lung lobe 3 (cells/ m <sup>2</sup> ) | Lung lobe 4 (cells/ m <sup>2</sup> ) | Average cells/m <sup>2</sup> |
|-----------|------------|-----|--------------------------------------|--------------------------------------|--------------------------------------|--------------------------------------|------------------------------|
| Mock      | F49        | F   | 23                                   | 34                                   | N/A                                  | N/A                                  | 26                           |
|           | F263       | F   | 48                                   | 32                                   | 33                                   | N/A                                  | 38                           |
|           | M299       | M   | 28                                   | 36                                   | 43                                   | N/A                                  | 36                           |
|           | M7         | M   | 32                                   | 40                                   | N/A                                  | N/A                                  | 36                           |
|           | F208       | F   | 17                                   | 23                                   | 23                                   | N/A                                  | 21                           |
|           | F209       | F   | 25                                   | 29                                   | 29                                   | N/A                                  | 28                           |
| WA1/2020  | F288       | F   | 18                                   | 13                                   | 23                                   | N/A                                  | 18                           |
|           | M8         | M   | 13                                   | 15                                   | 17                                   | 21                                   | 17                           |
|           | F216       | F   | 44                                   | 49                                   | 75                                   | 81                                   | 62                           |
|           | M222       | M   | 8                                    | 14                                   | 13                                   | 19                                   | 14                           |
|           | M223       | M   | 32                                   | 30                                   | 22                                   | 13                                   | 24                           |
| UT5       | F228       | F   | 18                                   | 19                                   | 24                                   | 30                                   | 23                           |
|           | F229       | F   | 13                                   | 10                                   | 11                                   | 21                                   | 14                           |
|           | M234       | M   | 16                                   | 16                                   | 24                                   |                                      | 19                           |
|           | M235       | M   | 14                                   | 20                                   | 23                                   | 33                                   | 19                           |
| UT21      | F215       | F   | 58                                   | 32                                   | 22                                   | 44                                   | 39                           |
|           | M11        | M   | 25                                   | 29                                   | 29                                   | N/A                                  | 28                           |
|           | F57        | F   | 105                                  | 63                                   | 60                                   | 58                                   | 72                           |
|           | M10        | M   | 105                                  | 60                                   | 51                                   | 46                                   | 66                           |
| UT23      | F240       | F   | 25                                   | 26                                   | 26                                   | 35                                   | 28                           |
|           | F241       | F   | 41                                   | 38                                   | 23                                   | N/A                                  | 38                           |
|           | M246       | M   | 23                                   | 22                                   | 20                                   | 15                                   | 20                           |
|           | M247       | M   | 63                                   | 39                                   | 61                                   | N/A                                  | 54                           |
| UT29      | F276       | F   | 32                                   | 34                                   | 24                                   | 19                                   | 27                           |
|           | F140       | F   | 26                                   | 33                                   | 35                                   | 40                                   | 34                           |
|           | M9         | M   | 12                                   | 10                                   | 19                                   | 27                                   | 16                           |
|           | M101       | M   | 7                                    | 8                                    | 16                                   | N/A                                  | 10                           |

N/A – lobe not present in tissue section
