# Supplementary material for: Dissecting Phenotype from Genotype with Clinical Isolates of SARS-CoV-2 First Wave Variants
Source: MDPI journal article supplement (doi:10.3390/v15030611), 2023-02-23
Supplement: s1 [file s1]

**TABLE S1. UT-V1 primers used for disjointed amplicon tiling approach**

| Primer No. | Primer Pool | Forward Primer Genome Location | Sequence                       | Reverse Primer Genome Location | Sequence                    |
|------------|-------------|--------------------------------|--------------------------------|--------------------------------|-----------------------------|
| 1          | 2           | 1-28                           | WTKRWWGGTTTATACCTTCCCAGGTAAC   | 533-556                        | GTACTGAATGCCTTCGAGTTCTGC    |
| 2          | 3           |                                |                                | 1055-1077                      | GGACATTCCCCATTGAAGGTGTC     |
| 3          | 1           | 472-494                        | GTTTCATCAAACGTTCCGAWGCTC       | 1544-1568                      | GGTTACAACCTATGTTAGCGYTAGC   |
| 4          | 2           | 1006-1031                      | GAGCTATGAATTGCAGACACCTTTTG     | 2142-2164                      | CTCTTCAAGCCAATCAAGGACGG     |
| 5          | 3           | 1485-1509                      | GAGGCTGTGTGTTCTCTTATGTTGG      | 2567-2592                      | GCTTCAACAGCTTCACTAGTAGGTTG  |
| 6          | 1           | 2061-2086                      | CCTACATTACAGGTGGTGTGTTTCAG     | 3044-3068                      | CACCTTCTTCTTCATCCTCATCTGG   |
| 7          | 2           | 2494-2516                      | GGGAGAAACACTTCCACAGAAG         | 3539-3564                      | CCCCTTTAAGTGGTCCATTAGTAGC   |
| 8          | 3           | 2993-3018                      | GAGTCTGGTGAGTTTAAATTGGCTTC     | 4139-4163                      | CCACAGCAGTTAAACACCCTCTTG    |
| 9          | 1           | 3473-3496                      | GGTGTTGCAGGAGCCTTAAATAAG       | 4556-4583                      | CGTTAAGTGTGTGATAAGTGACGCTAC |
| 10         | 2           | 4067-4093                      | GCCACTCTTGTTAGTGACATTGACATC    | 5031-5055                      | GTTGGACCAAACCTGTTGTCCATATG  |
| 11         | 3           | 4499-4523                      | CAAGAGGGTGTGGTTGATTATGGTG      | 5609-5633                      | CACACGTACAAGGTATCTGAACACC   |
| 12         | 1           | 4983-5008                      | CAGTAGACAACATTAACCTCCACACG     | 5988-6012                      | GGTACAAGATCAATTGGTTGCTCTG   |
| 13         | 2           | 5532-5555                      | GACAACAGCAGACAACCCTTAAGG       | 6530-6553                      | CATTAGATCTGTGTGGCCAAACCTC   |
| 14         | 3           | 5921-5946                      | GGTGTTGTTGTACAGAAATTGACCC      | 7042-7067                      | CTCTGTAACCAGTACAGTAAGAAGGC  |
| 15         | 1           | 6428-6454                      | CCTACCATACAGAAAGACGTTCTTGAG    | 7515-7539                      | GTTGTACATTGACTCTTGTTGCTC    |
| 16         | 2           | 6997-7019                      | CTACTCAACGCTGCTTTAGGTG         | 8003-8025                      | GCAACTTCCGCACTATCACCAAC     |
| 17         | 3           | 7457-7485                      | GTGCATGTTGTAGACGGTTGAATTCATC   | 8488-8513                      | CTTGCTAGTAGTTGCACATGTCAAC   |
| 18         | 1           | 7932-7955                      | CAGCGTCTGTTTACTACAGTCAGC       | 9035-9057                      | GGTACTGGCTTACCAGAAGCATC     |
| 19         | 2           | 8382-8408                      | GTCACAACATTGCTTTGATATGGAACG    | 9422-9447                      | GCAAGGCATGTTACTACGATAGCTAC  |
| 20         | 3           | 8975-9000                      | GAGTACACTGACTTTGCAACATCAGC     | 10073-10097                    | CCTCAACTTACCAGATGGGAATGC    |
| 21         | 1           | 9363-9389                      | CACCTAATCAACCTATTGGTGCTTTGG    | 10517-10543                    | GTGCATGTAACAAAAAGAGACACAGTC |
| 22         | 2           | 9998-10023                     | GGTTCTGATGTTCTTTACCAACCACC     | 10958-10981                    | CACTGCACTTTGGAAAGTAACACC    |
| 23         | 3           | 10432-10456                    | CCAATGTGCTATGAGGCCCAATTTTC     | 11516-11540                    | CAATACCTCTGGCCAAAAACATGAC   |
| 24         | 1           | 10886-10908                    | GGACGTACCATAATTGGGTAGTGC       | 12137-12161                    | GCTCATAAGCTTCTTGAGCAGTAGC   |
| 25         | 2           | 11441-11466                    | GCTTTAGATCAAGCCATTTCATGTG      | 12613-12638                    | GCCATGCTAAATTAGGTGAATTGTCC  |
| 26         | 3           | 12073-12098                    | CAACAGGGCAACCTTACAAGCTATAG     | 13072-13094                    | CAGCATCTACAGCAAAAGCACAG     |
| 27         | 1           | 12553-12582                    | GGAAATCCAACAGGTTGTAGATGCAGATAG | 13511-13536                    | GTATACGACATCAGTACTAGTGCTG   |
| 28         | 2           | 12981-13007                    | GAGGTATGGTACTTGGTAGTTTAGCTG    | 14181-14202                    | CTCTGCAGTTAAAGCCCTGGTC      |
| 29         | 3           | 13459-13484                    | GTTTTTAAACGGGTTTGCAGGTGTAAG    | 14547-14572                    | GGTCAGCAGCATACACAAGTAATTCC  |
| 30         | 1           | 14106-14128                    | CATACAAACCACGCCAGGTAGTG        | 15088-15109                    | CGGTGCGAGCTCTATTCTTTC       |

|    |   |             |                             |             |                                 |
|----|---|-------------|-----------------------------|-------------|---------------------------------|
| 31 | 2 | 14478-14503 | CCACTTCAGAGAGCTAGGTGTTGTAC  | 15540-15566 | GATAAAAGTGCATTAACATTGGCCGTG     |
| 32 | 3 | 14913-14937 | CCAAGTCATCGTCAACAACCTAGAC   | 16005-16028 | GCTAAAGACACGAACCGTTCAATC        |
| 33 | 1 | 15485-15508 | CAGGAGATGCCACAAGTCTTATG     | 16526-16551 | GTCAGTAACATTATCGCTACCAACAC      |
| 34 | 2 | 15921-15944 | GTACCTTCCTTACCCAGATCCATC    | 17134-17158 | CTGTATACACTATGCGAGCAGAAGG       |
| 35 | 3 | 16475-16501 | GTTTTCCATTGTGTGCTAATGGACAAG | 17528-17552 | CCGAGGAACATGTCTGGACCTATAG       |
| 36 | 1 | 17064-17087 | GTATTCTACACTCCAGGGACCACC    | 18086-18109 | GTGCCTGTGTAGGATGTAACCCAG        |
| 37 | 2 | 17462-17485 | GCACATTGCTAACTAAGGGCACAC    | 18508-18534 | CTTATACGCACTACATTCCAAGGAAG      |
| 38 | 3 | 18013-18037 | CCACGTAGGAATGTGGCAACTTTAC   | 19089-19113 | GTCACTACAAGGCTGTGCATCATAG       |
| 39 | 1 | 18457-18481 | CCACCGCTGGAGATCAATTTAAAC    | 19542-19565 | CACAAGCTAAAGCCAGCTGAGATC        |
| 40 | 2 | 19018-19042 | CCAGTCTTCACGACATTGGTAACC    | 19990-20016 | GTCTACTTGACCATCAACTCTACCATC     |
| 41 | 3 | 19478-19501 | GTGGTGCTGTCTGTAGACATCATG    | 20610-20635 | CTACATGGCCATCTTTACACCAAAGC      |
| 42 | 1 | 19932-19957 | GACTGACATAGCCAAGAAACCAACTG  | 20962-20987 | GTTGAATCTGCATCAGAGACAAAGTC      |
| 43 | 2 | 20469-20493 | GCAAACAGGTTTCATCTAAGTGTGTG  | 21679-21704 | CTGAGGATCTGAAAACCTTTGTCAGGG     |
| 44 | 3 | 20905-20927 | GCTGTTTTAAGACAGTGGTTGCC     | 21896-21917 | GTAGGGACTGGGTCTTCCAATC          |
| 45 | 1 | 21632-21657 | CAATTACCCCTGCATACACTAATTC   | 22630-22653 | GCAACACAGTTGCTGATTCTCTTC        |
| 46 | 2 | 21808-21833 | CCCTGTCTACCATTTAATGATGGTG   | 22976-22998 | GTGCTACCGGCCTGATAGATTTTC        |
| 47 | 3 | 22574-22599 | CCTTTTGGTGAAGTTTTTAACGCCAC  | 23627-23652 | GTGTAGGCAATGATGGATTGACTAGC      |
| 48 | 1 | 22856-22878 | GGCTGCGTTATAGCTTGGAATTC     | 24098-24120 | GCACAAATGAGGTCTCTAGCAGC         |
| 49 | 2 | 23570-23596 | GGTATATGCGCTAGTTATCAGACTCAG | 24512-24536 | CTTCAGCCTCAACTTTGTCAAGACG       |
| 50 | 3 | 24056-24080 | GCTGGCTTCATCAAACAATATGGTG   | 25109-25133 | CAACCTCATTGAGGCGGTCAATTTTC      |
| 51 | 1 | 24445-24469 | CACGCTTGTTAAACAACCTTAGCTCC  | 25447-25472 | GAAGGAGTAGCATCCTTGATTTACC       |
| 52 | 2 | 25052-25078 | GATGTTGATTAGGTGACATCTCTGGC  | 26104-26128 | GGACATGTTCTTCAGGCTCATCAAC       |
| 53 | 3 | 25352-25376 | CCAGTGCTCAAAGGAGTCAAATTAC   | 26453-26478 | CGTTTAGACCAGAAGATCAGGAACTC      |
| 54 | 1 | 26031-26057 | CCAGCTGTACTCAACTCAATTGAGTAC | 27093-27117 | GACTGTATGCAGCAAAACCTGAGTC       |
| 55 | 2 | 26373-26398 | CTGCTGCAATATTGTTAACGTGAGTC  | 27493-27517 | CGTATGTTCCAGAAGAGCAAGGTTC       |
| 56 | 3 | 27001-27024 | GTGACATCAAGGACCTGCCTAAAG    | 27990-28014 | GAATAGGACACGGGTCATCAACTAC       |
| 57 | 1 | 27428-27453 | CACTCGCTACTTGTGAGCTTTATCAC  | 28534-28559 | GAATTCGTCTGGTAGCTCTTCGGTAG      |
| 58 | 2 | 27931-27955 | CTGTAGCTGCATTTACCAAGAATG    | 29025-29047 | CTTCTTAGAAGCCTCAGCAGCAG         |
| 59 | 3 | 28481-28504 | GGACAAGGCGTTCCAATTAACACC    | 29551-29576 | CGTTTATATAGCCCATCTGCCTTGTG      |
| 60 | 1 | 28971-28994 | GCAAAATGTCTGGTAAAGGCCAAC    | 29844-29873 | KTYWTTYTYYYRAGARGYTM TYMAAATCAC |
| 62 | 2 | 29487-29512 | CCAAACAATTGCAACAATCCATGAGC  |             |                                 |
