# Supplementary material for: Dissecting Phenotype from Genotype with Clinical Isolates of SARS-CoV-2 First Wave Variants
Source: MDPI journal article supplement (doi:10.3390/v15030611), 2023-02-23
Supplement: s1 [file s1]

**TABLE S2. MinION Sequencing Results**

| Specimen ID No.            | Primer Set | Total Length (Gb) | N Count | Percent Genome Coverage | qRT-PCR Ct 1 (ORF1ab gene) <sup>a</sup> | qRT-PCR Ct 2 (E gene) <sup>a</sup> | Lineage (Pangolin) |
|----------------------------|------------|-------------------|---------|-------------------------|-----------------------------------------|------------------------------------|--------------------|
| Lab Reference USA-WA1/2020 | UT-V1      | 1.53              | 91      | 100                     | N/A                                     | N/A                                | A                  |
| UT1                        | UT-V1      | 0.1               | 10472   | 65                      | 32.26                                   | 34.63                              | ns                 |
| UT2                        | UT-V1      | 1.25              | 388     | 99                      | 24.26                                   | 24.84                              | B.1.324            |
| UT3                        | UT-V1      | 0.35              | 971     | 97                      | 31.41                                   | 34.28                              | B.1.184            |
| UT4                        | UT-V1      | 0.35              | 5263    | 82                      | 32.11                                   | 35.38                              | ns                 |
| UT5                        | UT-V1      | 3.84              | 95      | 100                     | 18.29                                   | 18.04                              | B.1.595            |
| UT6                        | UT-V1      | 0.41              | 2826    | 91                      | 34.82                                   | 35.79                              | ns                 |
| UT7                        | UT-V1      | 0.15              | 25886   | 13                      | 34.31                                   | 38.75                              | ns                 |
| UT8                        | UT-V1      | 0.76              | 389     | 99                      | 25.55                                   | 26.08                              | B.1.110.3          |
| UT9                        | UT-V1      | 1.4               | 384     | 99                      | 23.09                                   | 23.92                              | B.1.110.3          |
| UT10                       | UT-V1      | 3.01              | 92      | 100                     | 16.64                                   | 16.51                              | B.1.595            |
| UT11                       | UT-V1      | 0.26              | 406     | 99                      | 30.94                                   | 31.73                              | B.1.595            |
| UT12                       | UT-V1      | 1.27              | 384     | 99                      | 24.65                                   | 25.04                              | B.1                |
| UT13                       | UT-V1      | 0.46              | 23089   | 23                      | 32.76                                   | 34.5                               | ns                 |
| UT14                       | UT-V1      | 1.84              | 384     | 99                      | 25.03                                   | 25.95                              | B.1                |
| UT15                       | UT-V1      | 4.75              | 384     | 99                      | 17.85                                   | 18.28                              | B.1                |
| UT16                       | UT-V1      | 0.69              | 568     | 98                      | 30.72                                   | 32.81                              | B.1.567            |
| UT17                       | UT-V1      | 0.33              | 26755   | 11                      | 32.65                                   | 34.84                              | ns                 |
| UT18                       | UT-V1      | 0.94              | 860     | 97                      | 29.3                                    | 30.14                              | B.1.369            |
| UT19                       | UT-V1      | 0.73              | 1402    | 95                      | 30.93                                   | 32.8                               | B.1                |
| UT20                       | UT-V1      | 0.86              | 384     | 99                      | 28.96                                   | 29.97                              | B.1                |
| UT21                       | UT-V1      | 1.71              | 388     | 99                      | 20.04                                   | 20.36                              | A.1                |
| UT22                       | ARTIC V3   | 0.77              | 121     | 100                     | 24.93                                   | 25.65                              | B.1                |
| UT23                       | ARTIC V3   | 0.6               | 122     | 100                     | 23.68                                   | 23.85                              | B.1                |
| UT24                       | ARTIC V3   | 0.04              | 8908    | 70                      | 31.82                                   | 33.22                              | ns                 |
| UT25                       | ARTIC V3   | 0.1               | 8368    | 72                      | 32.59                                   | 34.79                              | ns                 |
| UT26                       | ARTIC V3   | 0.12              | 4661    | 84                      | 32.06                                   | 34.94                              | ns                 |
| UT27                       | ARTIC V3   | 0.92              | 121     | 100                     | 15.63                                   | 15.76                              | B.1.411            |
| UT28                       | ARTIC V3   | 0.88              | 121     | 100                     | 17.78                                   | 18.15                              | B.1.411            |
| UT29                       | ARTIC V3   | 0.71              | 121     | 100                     | 15.83                                   | 16                                 | B.1                |
| UT30                       | ARTIC V3   | 0.69              | 121     | 100                     | 15.07                                   | 15.5                               | B.1.12             |
| UT31                       | ARTIC V3   | 0.7               | 121     | 100                     | 27.44                                   | 28.17                              | B.1                |
| UT32                       | ARTIC V3   | 0.64              | 124     | 100                     | 21.28                                   | 21.69                              | B.1                |
| UT33                       | ARTIC V3   | 0.58              | 122     | 100                     | 25                                      | 25.33                              | B.1.411            |
| UT34                       | ARTIC V3   | 0.95              | 122     | 100                     | 14.83                                   | 15.06                              | B.1                |
| UT35                       | ARTIC V3   | 0.54              | 1445    | 95                      | 31.43                                   | 32.61                              | B.1.1.307          |
| UT36                       | ARTIC V3   | 2                 | 150     | 99                      | 21.93                                   | 22.09                              | B.1.1              |
| UT37                       | ARTIC V3   | 0.21              | 4059    | 86                      | 30.47                                   | 32.84                              | ns                 |
| UT38                       | ARTIC V3   | 0.51              | 1763    | 94                      | 30.42                                   | 31.16                              | B.1.446            |
| UT39                       | ARTIC V3   | 1.58              | 701     | 98                      | 25.59                                   | 25.63                              | B.1                |
| UT40                       | ARTIC V3   | 0.68              | 1113    | 96                      | 29.1                                    | 30.23                              | B.1.360            |
| UT41                       | ARTIC V3   | 0.42              | 7528    | 75                      | 31.41                                   | 33.8                               | ns                 |
| UT42                       | ARTIC V3   | 0.26              | 2775    | 91                      | 30.82                                   | 32.3                               | ns                 |
| UT43                       | ARTIC V3   | 0.1               | 28488   | 5                       | 32.74                                   | 38.26                              | ns                 |
| UT44                       | ARTIC V3   | 0.28              | 1022    | 97                      | 22.07                                   | 22.68                              | B.1.595            |
| UT45                       | ARTIC V3   | 1.05              | 979     | 97                      | 30.18                                   | 30.6                               | B.1                |

<sup>a</sup> qRT-PCR Ct values were tested on the Roche Cobas 6800/8000 instrument; Abbreviations: ns – sequence quality was not sufficient for phylogenetic analysis; N count – total number of ‘N’ or unknown bases in the consensus sequence
